# Supplementary material
Source: PubMed Central journal article supplement (PMC4017938)

Type of file: figure

Label: Appendix 2

Filename: Figure (Appendix 2).pdf

**Figure. Preferences for ICD deactivation based on hypothetical clinical scenarios**

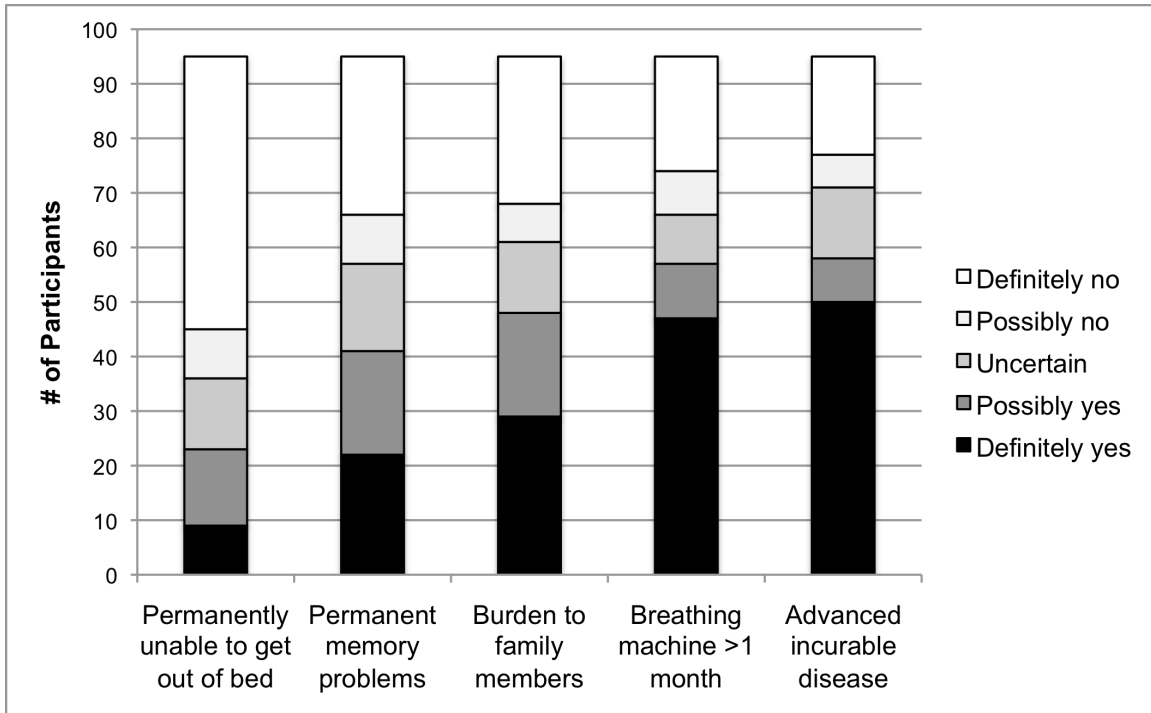

Supplement: NIHMS575498-supplement-01.pdf [file NIHMS575498-supplement-01.pdf]
